# Supplementary material
Source: publisher figshare collection journal article supplement (https://frontiersin.figshare.com/ndownloader/files/20025125)
Supplement: Supplementary file [file 20025125]

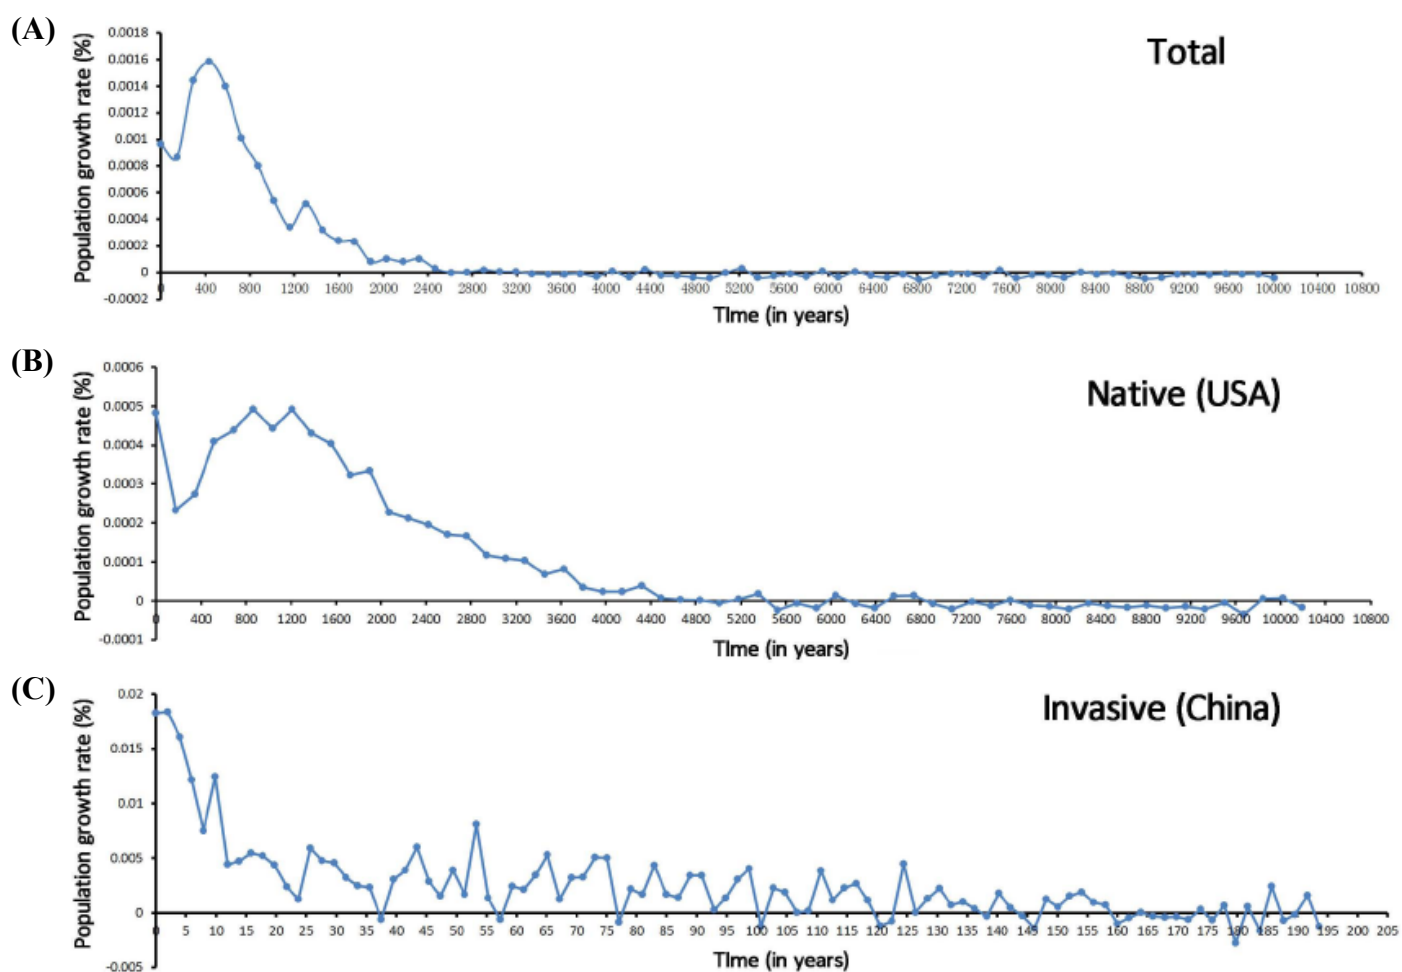

**Supplementary Figure 4. Changes of population growth rate through time. (A) total populations, (B) native US populations and (C) invasive Chinese populations.**
